# Supplementary material
Source: publisher figshare collection journal article supplement (https://gsajournals.figshare.com/ndownloader/files/22543946)
Supplement: Supplementary file 1 [file 22543946]

## Sheet: Sheet1
Analysis	Source	df	MS	F	P	σ2 (SE)	H2	rMF
Sexes Pooled	Sex (S)	1	1975	0.88	0.35	Fixed	0.25	0.77
	Line (L)	200	11305	5.04	7.12e-28	222.41 (28.32)
	S×L	200	2242	2.53	3.56e-27	67.04 (11.08)
	Error	7709	886			886.10 (14.27)
Females	Line (L)	200	6931	7.83	2.14e-169	291.71 (33.49)	0.25
	Error	3887	885			885.02 (20.07)
Males	Line (L)	200	6660	7.51	4.67e-160	287.13 (33.14)	0.24
	Error	3822	887			887.34 (20.30)
